# Supplementary material for: Dietary Acid Load and Relationship with Albuminuria and Glomerular Filtration Rate in Individuals with Chronic Kidney Disease at Predialysis State
Source: MDPI journal article supplement (doi:10.3390/nu14010170), 2021-12-30
Supplement: s1 [file s1]

**Table S1. NEWCASTLE-OTTAWA QUALITY ASSESSMENT SCALE**

|                        | <b>Selection</b> | <b>Comparability</b> | <b>Outcome</b> | <b>Final Score</b> |
|------------------------|------------------|----------------------|----------------|--------------------|
| (Toba et al. 2019)     | 4                | 2                    | 2              | 8                  |
| (Banerjee et al. 2018) | 4                | 2                    | 2              | 8                  |
| (Kabasawa et al. 2019) | 4                | 2                    | 3              | 9                  |
| (Pike et al. 2019)     | 4                | 2                    | 3              | 9                  |
| (Brown et al. 2019)    | 4                | 2                    | 3              | 9                  |
